# Supplementary material
Source: PubMed Central journal article supplement (PMC10064239)
Supplement: mmc1.pdf [file mmc1.pdf]

**Supplemental information**

**PGC-1s shape epidermal physiology  
by modulating keratinocyte proliferation  
and terminal differentiation**

**Simon-Pierre Gravel, Youcef Ben Khalifa, Shawn McGuirk, Catherine St-Louis, Karl M. Laurin, Émilie Lavallée, Damien Benas, Stéphanie Desbouis, Frédéric Amaral, Damien D'Amours, Lionel Breton, Sibylle Jäger, and Julie St-Pierre**

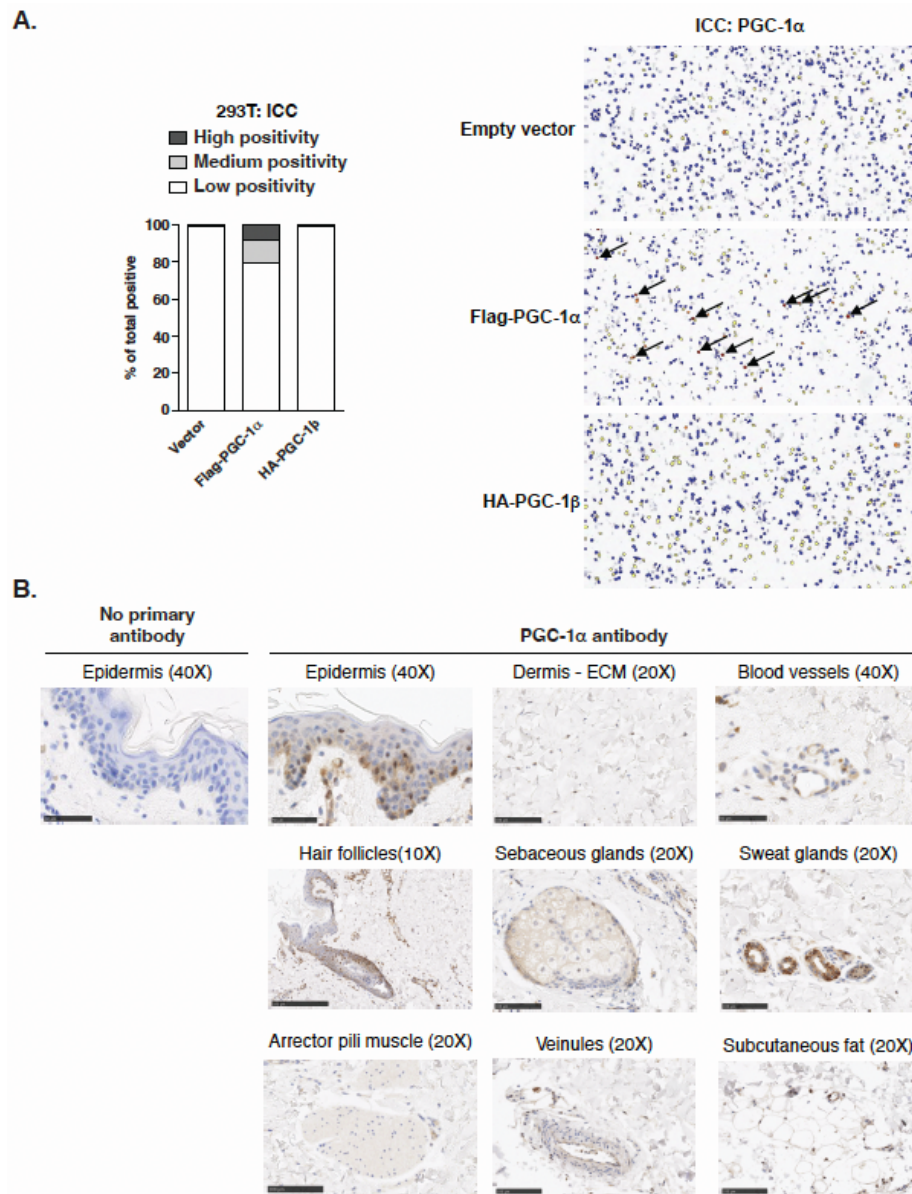

**Figure S1. Validation of the anti-PGC-1 $\alpha$  antibody.** Related to Figure 1.

(A) Immunocytochemistry for PGC-1 $\alpha$  in 293T cells transfected with Flag-PGC-1 $\alpha$ , HA-PGC-1 $\beta$  or equivalent concentration of the corresponding empty plasmid. Only 293T cells transfected with Flag-PGC-1 $\alpha$  showed medium and high positivity staining. (B) Immunohistochemistry for PGC-1 $\alpha$  in various human skin features. Panel B is a complement to Figure 1D.

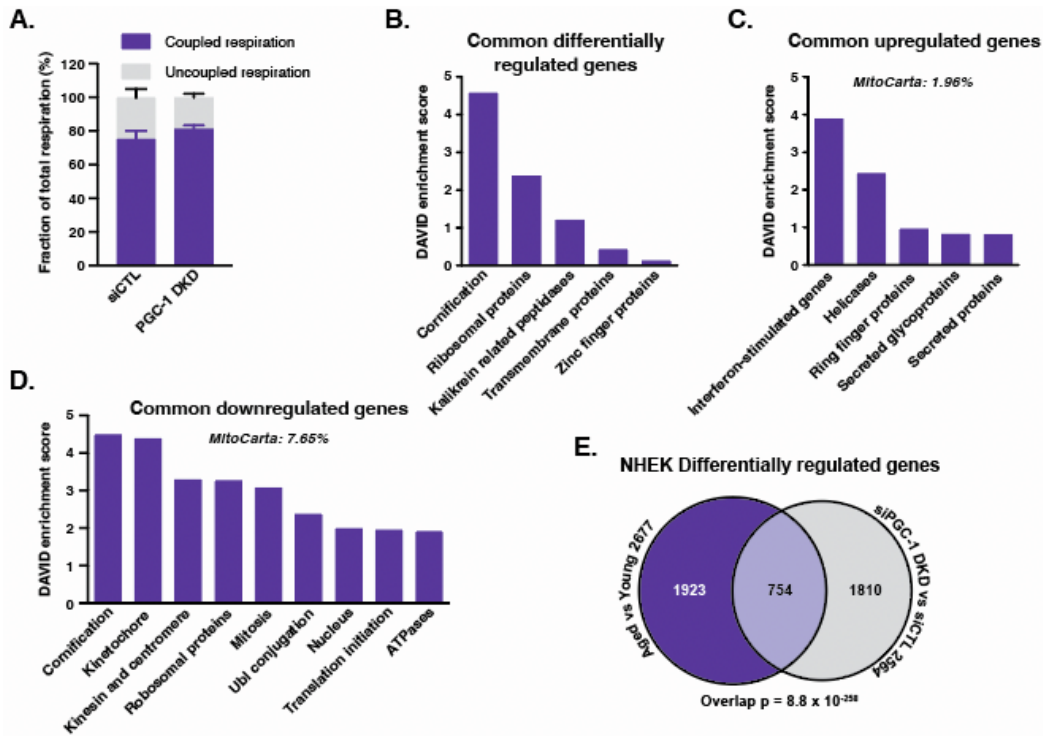

| Analysis of upregulated genes in Aged vs Young |            | Analysis of downregulated genes in Aged vs Young |             |
|------------------------------------------------|------------|--------------------------------------------------|-------------|
| Over-represented TFBS                          | P-value    | Over-represented TFBS                            | P-value     |
| MAFG:NFE2L1                                    | 0.67E-04   | E2F4                                             | 1.64E-06    |
| Stat4                                          | 1.30E-03   | E2F1                                             | 2.01E-06    |
| ATF4                                           | 0.00129942 | TFDP1                                            | 2.78499E-06 |
| JDP2                                           | 0.00167059 | E2F6                                             | 2.27123E-05 |
| TBK5                                           | 0.00226745 | MYA                                              | 0.000110547 |
| Stat3a:Stat5b                                  | 0.00251769 | ZBTB7A                                           | 0.000296722 |
| NFE2                                           | 0.00302704 | MYB                                              | 0.000332058 |
| JUN                                            | 0.00319455 | SP2                                              | 0.000551221 |
| ZBTB18                                         | 0.00329712 | SP1                                              | 0.000647763 |
| ESR2                                           | 0.00340408 | KLF5                                             | 0.000687544 |
| BATF:JUN                                       | 0.00371306 | ETV5                                             | 0.0010241   |
| NRL                                            | 0.00465977 | SP3                                              | 0.0012252   |
| TBK4                                           | 0.00545705 | ELK4                                             | 0.00126166  |
| SOM5                                           | 0.00550016 | EGR4                                             | 0.00169567  |
| JUN(wr.2)                                      | 0.00602046 | Smad4                                            | 0.00169946  |
| IRF3                                           | 0.00790523 | ETV1                                             | 0.00185386  |
| FOSL1                                          | 0.00798434 | LxR                                              | 0.00185995  |
| STAT3                                          | 0.00812194 | SMAD3                                            | 0.00217648  |
| IRF8                                           | 0.00874022 | Gmab1                                            | 0.00221116  |
| TBK1                                           | 0.00910568 | ETV6                                             | 0.0024209   |
| NR3C2                                          | 0.00923449 | EGR2                                             | 0.00261472  |
| STAT1                                          | 0.0098789  | Gabpa                                            | 0.00264632  |
| MEOX1                                          | 0.0100219  | KLF16                                            | 0.00277719  |
| TBK2                                           | 0.0104227  | ERG                                              | 0.00287955  |
| TBK20                                          | 0.010675   | NR1                                              | 0.00327699  |

  

| Analysis of shared upregulated genes |             | Analysis of shared downregulated genes |             |
|--------------------------------------|-------------|----------------------------------------|-------------|
| Over-represented TFBS                | P-value     | Over-represented TFBS                  | P-value     |
| ZBTB18                               | 5.03E-04    | ELK3                                   | 1.61E-05    |
| MAFG:NFE2L1                          | 6.38E-04    | ELK1                                   | 2.40E-05    |
| JUN                                  | 0.000940986 | ETV5                                   | 3.25666E-05 |
| IRF3                                 | 0.00100962  | MYB                                    | 3.96496E-05 |
| ESR2                                 | 0.0010319   | ETV1                                   | 5.88389E-05 |
| NR3C2                                | 0.00195509  | ETV3                                   | 6.04624E-05 |
| Stat3a:Stat5b                        | 0.00196193  | ETV4                                   | 9.70354E-05 |
| BATF:JUN                             | 0.00242824  | FEV                                    | 0.000114488 |
| NRL                                  | 0.00249255  | PAX4                                   | 0.000151861 |
| IRF9                                 | 0.00398833  | STAT1:STAT2                            | 0.000174991 |
| ATF4                                 | 0.00437921  | GMEB2                                  | 0.000194828 |
| NRL                                  | 0.00506708  | TEAD4                                  | 0.000246914 |
| NR3C1                                | 0.00514178  | FLI1                                   | 0.000252903 |
| JDP2                                 | 0.00547555  | ETV2                                   | 0.000260464 |
| TWIST1                               | 0.00592023  | ELF1                                   | 0.000261062 |
| FOXA1                                | 0.00642341  | ERF                                    | 0.000363852 |
| TBK5                                 | 0.00705105  | ERG                                    | 0.000364484 |
| IRF8                                 | 0.00744711  | Hes6                                   | 0.000401243 |
| TP53                                 | 0.00764341  | LMO9                                   | 0.000411718 |
| Sox17                                | 0.00775251  | TEAD1                                  | 0.00043063  |
| JUN(wr.2)                            | 0.00793771  | ETV6                                   | 0.000455334 |
| NFE2                                 | 0.00837516  | EMX1                                   | 0.000579516 |
| JUN(wr.2)                            | 0.00854396  | ETS1                                   | 0.000609914 |
| MEIS1                                | 0.0092247   | SHOX                                   | 0.000607548 |
| TBK19                                | 0.00992113  | ATF4                                   | 0.000621479 |

  

| Analysis of upregulated genes in siPGC-1 DKD vs siCTL |             | Analysis of downregulated genes in siPGC-1 DKD vs siCTL |             |
|-------------------------------------------------------|-------------|---------------------------------------------------------|-------------|
| Over-represented TFBS                                 | P-value     | Over-represented TFBS                                   | P-value     |
| JDP2                                                  | 8.44E-05    | ELK3                                                    | 3.01E-11    |
| RELA                                                  | 8.47E-05    | ELK1                                                    | 4.32E-11    |
| JUND                                                  | 0.000107842 | ETV5                                                    | 3.15283E-10 |
| NRA2                                                  | 0.00011049  | ETV1                                                    | 5.6653E-10  |
| NFE2                                                  | 0.00011241  | ETV4                                                    | 1.52029E-09 |
| Stat3a:Stat5b                                         | 0.000213703 | FEV                                                     | 1.814E-09   |
| FOSL2                                                 | 0.000299243 | GMEB2                                                   | 4.71577E-09 |
| JUN(wr.2)                                             | 0.000357456 | FLI1                                                    | 2.71597E-08 |
| FOSL1                                                 | 0.000401932 | ERF                                                     | 5.88127E-08 |
| ZBTB18                                                | 0.000688942 | ETV3                                                    | 9.75915E-08 |
| JUNB                                                  | 0.00109502  | ERG                                                     | 1.36251E-07 |
| FOS                                                   | 0.00127252  | ELK4                                                    | 1.48174E-07 |
| FOS:JUND                                              | 0.00144144  | ETS1                                                    | 1.82201E-07 |
| RORA                                                  | 0.00153528  | Gabpa                                                   | 1.93471E-07 |
| REL                                                   | 0.00184633  | ELF1                                                    | 3.495E-07   |
| FOSL2:JUN                                             | 0.0021201   | ELF4                                                    | 8.21314E-07 |
| FOXA1                                                 | 0.00229877  | Gmab1                                                   | 3.3788E-06  |
| BATF:JUN                                              | 0.0024058   | ETV6                                                    | 5.25294E-06 |
| NR2F2                                                 | 0.00241138  | ZBTB7A                                                  | 8.35212E-06 |
| HSF2                                                  | 0.002708    | MYB                                                     | 1.04897E-05 |
| MYF6                                                  | 0.00296827  | AMD                                                     | 1.51583E-05 |
| FOXO1                                                 | 0.00307664  | SHF                                                     | 1.66277E-05 |
| PKNOK2                                                | 0.00372504  | Crem                                                    | 1.81663E-05 |
| FOXO1                                                 | 0.00378216  | HOKD11                                                  | 2.11119E-05 |
| Foxo2                                                 | 0.00385645  | CEBPD                                                   | 0.000054904 |

**Figure S2. Characterization of metabolic and gene expression changes by PGC-1s knockdown and aging in keratinocytes.** Related to figure 2. (A) Fraction of mitochondrial respiration that is coupled and uncoupled to ATP production in PGC-1 DKD or control HaCaT keratinocytes. Data are shown as mean from 3 independent experiments + SEM. (B) Gene functional classification analysis of differentially regulated genes shown in Figure 1D and shared between aging and PGC-1 DKD groups. (C) Analysis of upregulated genes shown in Figure 1D and shared between aging and PGC-1 DKD groups. (D) Analysis of downregulated genes shown in Figure 1D and shared between aging and PGC-1 DKD groups. For panels C and D, the % of identified genes that code for mitochondrial proteins is shown (human MitoCarta2.0 database). (E) Transcription factor binding site (TFBS) over-representation in NHEK from aged versus young donors, siPGC-1 DKD versus siCTL, and for the overlap between groups. Top: groups of differentially regulated genes and overlap. Bottom: the top 25 over-represented TFBS ( $p$ -value below 0.05) are presented for each group and overlap.

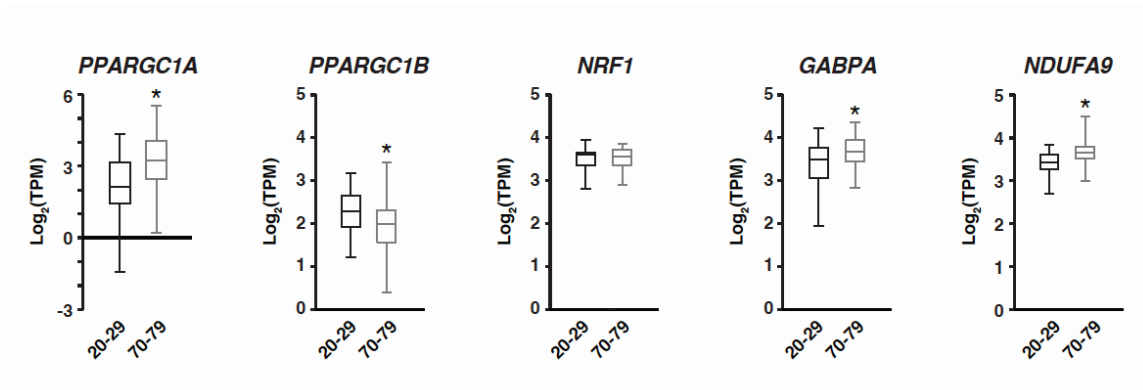

**Figure S3. Gene expression analyses of skin samples from young (20-29 years) and aged (70-79 years) donors.** Related to Figure 2. Analyses were performed using openly accessible RNA-seq data from the Genotype-Tissue Expression (GTEx) Project. Gene transcripts per million (TPMs) from suprapubic skin samples were sourced from GTEx Analysis V8 (dbGaP Accession phs000424.v8.p2). Data are shown as mean  $\pm$  STDEV using box plots. There are 35 young donors and 22 aged donors. \* $p < 0.05$ , unpaired Student's  $t$ -test.

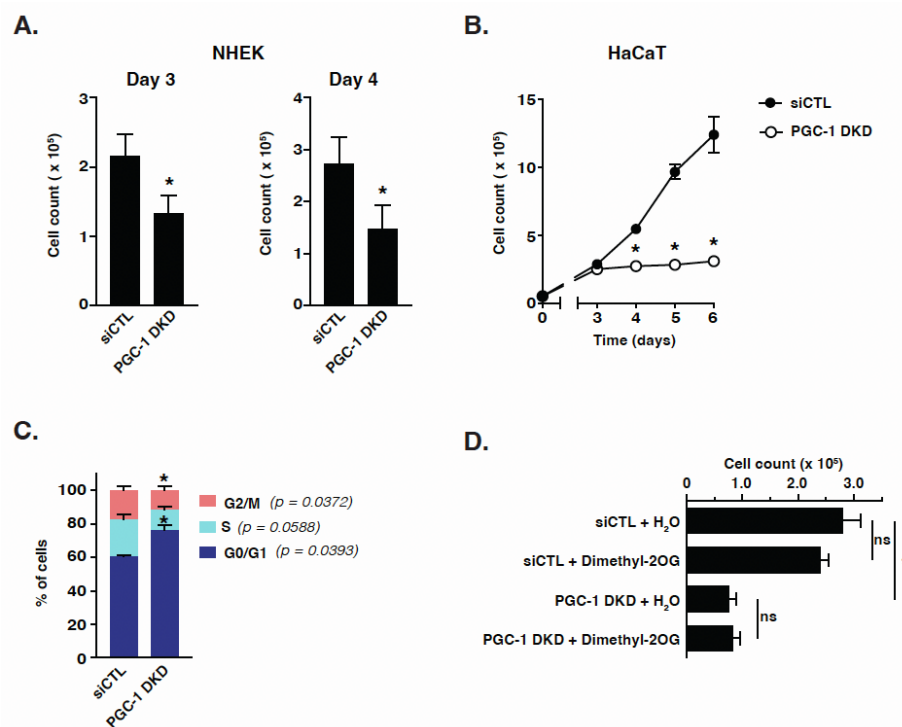

**Figure S4. Impact of PGC-1s knockdown on the proliferation of keratinocytes.** Related to Figure 4. (A) Proliferation curve of normal human epidermal keratinocytes (NHEK) transfected with control siRNA or PGC-1 DKD. Data are shown as mean + SEM from 3 independent experiments. \* $p < 0.05$ , paired Student's  $t$ -test. (B) Proliferation curve of HaCaT cells transfected with control siRNA or PGC-1 DKD. Data is shown as mean  $\pm$  SEM from 3 independent experiments. \* $p < 0.05$ , paired Student's  $t$ -test. (C) Cell cycle analysis of keratinocyte HaCaT cells transfected with control siRNA or PGC-1 DKD. Data are shown as mean + SEM from 3 independent experiments. \* $p < 0.05$ , paired Student's  $t$ -test. (D) Dimethyl-2OG cannot rescue the proliferation of PGC-1s depleted keratinocyte HaCaT cells. Data are shown as mean + SEM from 3 biological replicates. Data are representative of 2 independent experiments. \* $p < 0.05$ , Two-Way ANOVA, Tukey post-test.

**Table S1. List of oligonucleotides used for qPCR. Related to STAR Methods.**

| <b>Primer name</b>          | <b>Sequence (5'--&gt;3')</b> | <b>Source</b>     | <b>Identifyer</b>       |
|-----------------------------|------------------------------|-------------------|-------------------------|
| <i>PPARGCIA</i> -FWD        | CCTGTGATGCTTTTGCTGCTCTTG     | This paper        | N/A                     |
| <i>PPARGCIA</i> -REV        | AAACTATCAAAATCCAGAGAGTCA     | This paper        | N/A                     |
| <i>PPARGCIB</i> -FWD        | GTACATTCAAAATCTCTCCAGCGACATG | This paper        | N/A                     |
| <i>PPARGCIB</i> -REV        | GAGGGCTCGTTGCGCTTCTCAGGGCAG  | This paper        | N/A                     |
| <i>B2M</i> -FWD             | GTGCTCGCGCTACTCTCTC          | This paper        | N/A                     |
| <i>B2M</i> -REV             | GTCAACTTCAATGTCCGGAT         | This paper        | N/A                     |
| <i>POLR2A</i> -FWD          | ATCTCTCCTGCCATGACACC         | This paper        | N/A                     |
| <i>POLR2A</i> -REV          | AGACCAGGCAGGGGAGTAAC         | This paper        | N/A                     |
| <i>TGMI</i> -FWD            | CCCCAAGAGACTAGCAGTG          | This paper        | N/A                     |
| <i>TGMI</i> -REV            | AAAATGAAAGGCGTGTGTA          | This paper        | N/A                     |
| <i>IVL</i> -FWD             | CCTCAGCCTTACTGTGAGT          | This paper        | N/A                     |
| <i>IVL</i> -REV             | TGCTCCTGATGGGTATTGAC         | This paper        | N/A                     |
| <i>KRT1</i> -FWD            | CGAGAAAGGGAGCAAATCAA         | This paper        | N/A                     |
| <i>KRT1</i> -REV            | TCCCATTTTGTTCAGTACC          | This paper        | N/A                     |
| <i>KRT10</i> -FWD           | GGGACCAAGATACTAACAAAACC      | This paper        | N/A                     |
| <i>KRT10</i> -REV           | GAAAGAACTCTACCGTCGGG         | This paper        | N/A                     |
| <i>CS</i> -FWD              | CAACTCAGGACGGGTTGTTCCAGG     | This paper        | N/A                     |
| <i>CS</i> -REV              | GCATGAATAAAGCAGCCAAGTGAG     | This paper        | N/A                     |
| <i>FAS</i> -FWD             | AGGTTTGATGCCTCCTTCTTCGGA     | This paper        | N/A                     |
| <i>FAS</i> -REV             | TGGCTTCATAGGTGACTTCCAGCA     | This paper        | N/A                     |
| <i>GSS</i> -FWD             | CCTGGCTGAGGGAGTATTG          | This paper        | N/A                     |
| <i>GSS</i> -REV             | TTTGATGGTGCTGGAAAGAGT        | This paper        | N/A                     |
| <i>GSR</i> -FWD             | TGATTCAATGATCAGCACCAAC       | This paper        | N/A                     |
| <i>GSR</i> -REV             | CAGTAACCATGCTGACTTCCA        | This paper        | N/A                     |
| <i>VEGFA</i> -FWD           | TACCTCCACCATGCAAAGTG         | This paper        | N/A                     |
| <i>VEGFA</i> -REV           | ATGATTCTGCCCTCCTCCTTC        | This paper        | N/A                     |
| <i>C3</i> -FWD              | AAGATAAGAACCGCTGGGAG         | This paper        | N/A                     |
| <i>C3</i> -REV              | GGAGGCACAAAGTCAAAGTC         | This paper        | N/A                     |
| <i>SGK1</i> -FWD            | GGTGATGACGGTGAAAAGTCTG       | This paper        | N/A                     |
| <i>SGK1</i> -REV            | AAAGCGATGAGAATTGCCAC         | This paper        | N/A                     |
| <i>IFIT1</i> -FWD           | TCCACAAGACAGAATAGCCA         | This paper        | N/A                     |
| <i>IFIT1</i> -REV           | CCATTTGTACTCATGGTTGCT        | This paper        | N/A                     |
| <i>PPARGCIA</i><br>(TaqMan) | N/A                          | Thermo Scientific | Fisher<br>Hs00173304 m1 |
| <i>PPARGCIB</i><br>(TaqMan) | N/A                          | Thermo Scientific | Fisher<br>Hs00993805 m1 |
| <i>IVL</i> (TaqMan)         | N/A                          | Thermo Scientific | Fisher<br>Hs00846307_s1 |
| <i>TGMI</i> (TaqMan)        | N/A                          | Thermo Scientific | Fisher<br>Hs00165929 m1 |
| <i>TBP</i> (TaqMan)         | N/A                          | Thermo Scientific | Fisher<br>Hs00427620 m1 |

**Table S2. List of shRNA sequences used for the preparation of lentiviruses.** Related to STAR Methods.

| <b>shRNA</b>                     | <b>21mer sequence</b>  | <b>Position on mRNA</b> | <b>Region</b> | <b>% of knockdown</b> | <b>Source</b> | <b>Identifyer</b> |
|----------------------------------|------------------------|-------------------------|---------------|-----------------------|---------------|-------------------|
| <b>Non targeting (NTshRNA)</b>   | GGAATCTCATTTCGATGCATAC | N/A                     | N/A           | N/A                   | This paper    | N/A               |
| <b>shPGC1<math>\alpha</math></b> | GCTATGGTTTCATTACCTACC  | 2181                    | CDS           | 68                    | This paper    | N/A               |
| <b>shPGC1<math>\beta</math></b>  | GCTGCTGAGAGACCATGAGAT  | 2233                    | CDS           | 72                    | This paper    | N/A               |
